# Supplementary material for: Mitogenomics and phylogenetics of twelve species of African Saturniidae (Lepidoptera)
Source: PeerJ. 2022 Apr 18;10:e13275. doi: 10.7717/peerj.13275 (PMC9022641; doi:10.7717/peerj.13275)
Supplement: Supplemental Information 1 — Species sequenced in this study and reference sequences used for the mapping of NGS reads of each species for recovery of complete mitogenomes. [file peerj-10-13275-s001.xlsx]

## Sheet: Sheet1
Species	Reference sequence	GenBank	Reference
Bunaea alcinoe (Stoll, 1780)	Gonimbrasia belina (Westwood, 1894)	NC046032	Langley et al., 2020
Epiphora bauhiniae (Guérin-Méneville, 1832)	Attacus atlas (Linnaeus, 1758)	NC021770	Chen et al., 2014
Eochroa trimenii (C. R. Felder, 1874)	Actias luna (Linnaeus, 1758)	NC045899	Langley et al., 2020
Gonimbrasia tyrrhea (Cramer, 1776)	Gonimbrasia belina (Westwood, 1894)	NC046032	Langley et al., 2020
Heniocha apollonia (Cramer, 1779)	Actias luna (Linnaeus, 1758)	NC045899	Langley et al., 2020
Heniocha dyops (Maassen, 1872)	Gynanisa maja (Klug, 1836)	NC046033	Langley et al., 2020
Holocerina smilax (Westwood, 1849)	Actias luna (Linnaeus, 1758)	NC045899	Langley et al., 2020
Ludia delegorguei (Boisduval, 1847)	Actias luna (Linnaeus, 1758)	NC045899	Langley et al., 2020
Nudaurelia cytherea (Fabricius, 1775)	Gynanisa maja (Klug, 1836)	NC046033	Langley et al., 2020
Nudaurelia wahlbergii (Boisduval, 1847)	Actias luna (Linnaeus, 1758)	NC045899	Langley et al., 2020
Vegetia ducalis (Jordan, 1922)	Actias luna (Linnaeus, 1758)	NC045899	Langley et al., 2020
Vegetia grimmia (Geyer, 1832)	Actias luna (Linnaeus, 1758)	NC045899	Langley et al., 2020
