# Supplementary material for: Mitogenomics and phylogenetics of twelve species of African Saturniidae (Lepidoptera)
Source: PeerJ. 2022 Apr 18;10:e13275. doi: 10.7717/peerj.13275 (PMC9022641; doi:10.7717/peerj.13275)
Supplement: Supplemental Information 2 — Complete mitogenome sequences of 35 species used in the phylogenetic reconstruction of the family Saturniidae (Lepidoptera), including new and publicly available data as of 9 August 2021. n. a. –information not available. [file peerj-10-13275-s002.xlsx]

## Sheet: Sheet2
Species	Tribe	Distribution	Common name	Specimen	Genbank	Reference
Actias artemis aliena (Butler, 1879)	Saturniini	Japan, Korea, China, India, Malaysia	Japanese Luna Moth	n.a.	KF927042	Park et al., 2016
Actias dubernardi (Oberthür, 1975)	Saturniini	China	Chinese Moonmoth	n.a.	MW133617	Zhao et al., 2021
Actias luna (Linnaeus, 1758)	Saturniini	North America	Luna Moth	n.a.	NC045899	Langley et al., 2020
Actias selene (Hübner, 1807)	Saturniini	India, Japan, Nepal, Sri Lanka, Borneo and other Eastern Asian islands	Indian Luna Moth	n.a.	NC018133	Liu et al., 2021
Antheraea assamensis (Helfer,1837)	Saturniini	Northeast India	Assam Silkmoth	n.a.	KU379695	Singh et al., 2017
Antheraea assamensis (Helfer,1837)	Saturniini	Northeast India	Assam Silkmoth	n.a.	NC030270	Direct submission
Antheraea frithi (Moore, 1859)	Saturniini	Northeast india	Wild Oak Tasar Silkworm	IBSDIRWSA1	NC027071	Shantibala et al., 2018
Antheraea pernyi (Guérin-Méneville, 1855)	Saturniini	Southern China, subtropical and tropical Asia	Chinese Oak Tasar Silkmoth	n.a.	NC004622	Liu et al., 2008
Antheraea x proylei (hybrid A. pernyi x A. roley)	Saturniini	Southern China, subtropical and tropical Asia	Indian Oak Silkmoth	In981	MK920216	Yang et al., 2019
Antheraea yamamai (Guérin-Ménéville, 1861)	Saturniini	East Asia and Europe	Japanese Oak Silkmoth	n.a.	NC012739	Kim et al., 2009
Attacus atlas (Linnaeus, 1758)	Attacini	Southeast Asia	Atlas Moth	SYAU01	NC021770	Chen et al., 2014
Bunaea alcinoe (Stoll, 1780)	Bunaeini	Southern Africa	Common Emperor	BA1.6	OL912807	This study
Cricula trifenestrata (Helfer, 1837)	Saturniini	India to the Philippines, Sulawesi, Java, and Sri Lanka	Cricula Silkmoth	CMERI-Ct-001	KY644697	Direct submission
Eochroa trimenii (C. & R. Felder, 1874)	Bunaeini	South Africa	Roseate Emperor	ET6	OL912808	This study
Epiphora bauhiniae (Guérin-Méneville, 1832)	Attacini	Southern Africa	Southern African Atlas Moth	GM5.2	OL912809	This study
Eriogyna pyretorum (Westwood, 1847)	Saturniini	South and Eastern China, South Korea	Giant Silkmoth	n.a.	NC012727	Jiang et al., 2009
Gonimbrasia belina (Westwood, 1894)	Bunaeini	Southern Africa	Anomalous Emperor	F1Y	NC046032	Langley et al., 2020
Gonimbrasia tyrrhea (Cramer, 1776)	Bunaeini	Southern Africa	Zigzag Emperor	GT1.1	OL912810	This study
Gynanisa maja (Klug, 1836)	Bunaeini	Southern Africa	Speckled Emperor	K5	NC046033	Langley et al., 2020
Heniocha apollonia (Cramer, 1779)	Bunaeini	Southern Africa	Southern Marbled Emperor	HA1	OL912811	This study
Heniocha dyops (Maassen, 1872)	Bunaeini	Southern Africa	Western Marbled Emperor	GM8.2	OL912812	This study
Holocerina smilax (Westwood, 1849)	Micragonini	Southern Africa	Variable Prince	HS5	OL912813	This study
Ludia delegorguei (Boisduval, 1847)	Micragonini	Southern Africa	Delegorgue's Prince	LD	OL912814	This study
Neoris haraldi (Schawerda, 1922)	Saturniini	China	n.a.	n.a.	NC036765	He et al., 2017
Nudaurelia cytherea (Fabricius, 1775)	Bunaeini	Southern Africa	Pine Emperor	NC1.2	OL912953	This study
Nudaurelia wahlbergii (Boisduval, 1847)	Bunaeini	Southern Africa	Wahlberg's Emperor	NW1	OL912817	This study
Rhodinia fugax (Butter, 1877)	Saturniini	China, Japan, Korea and Russia	Squeaking Silkmoth	n.a.	MT548575	Chen et al., 2021
Samia canningi (Hutton, 1859)	Attacini	Southeastern Asia, India, China	Wild Eri Silkmoth	n.a.	NC024270	Shantibala et al., 2016
Samia cynthia cynthia (Drury, 1773)	Attacini	China, Korea	Ailanthus Silkmoth	n.a.	KC812618	Sima et al., 2013
Samia cynthia ricini (Boisd.)	Attacini	China, Korea, India	Eri Silkmoth	n.a.	NC017869	Kim et al., 2012
Saturnia boisduvalii (Eversmann, 1849)	Saturniini	North and South Korea, Japan, Northern China, and Eastern Russia	Boisduval’s Silkmoth	n.a.	NC010613	Hong et al., 2008
Saturnia japonica (Moore, 1872)	Saturniini	Eastern Asia, China, Korea, Japan, and Russia	Japanese Giant Silkmoth	n.a.	MT614593	Liu et al., 2021
Saturnia jonasii (Butler, 1877)	Saturniini	Japan and Taiwan	n.a.	n.a.	MF346379	Kim et al., 2018
Vegetia ducalis (Jordan, 1922)	Micragonini	Southern Africa	Ducal Princeling	VD1	OL912815	This study
Vegetia grimmia (Geyer, 1832)	Micragonini	Southern Africa	Grimm’s Princeling	VG2	OL912816	This study
