# Supplementary material for: Mitogenomics and phylogenetics of twelve species of African Saturniidae (Lepidoptera)
Source: PeerJ. 2022 Apr 18;10:e13275. doi: 10.7717/peerj.13275 (PMC9022641; doi:10.7717/peerj.13275)
Supplement: Supplemental Information 3 — Results of BOLD and BLASTn queries of DNA barcodes of 12 species of African Saturniidae. [file peerj-10-13275-s003.xlsx]

## Sheet: Sheet1
Species	Tribe	Specimen	Life stage	Collection date	Country	Region	GPS		Edible	GenBank
Bunaea alcinoe (Stoll, 1780)	Bunaeini	BA1.6	Adult	2019-10-11	South Africa	Gauteng	-25.7479	28.2293	Yes	OL912807
Eochroa trimenii (C. & R. Felder, 1874)	Eochroini	ET6	Larva	2020-08-01	South Africa	Western Cape	-34.0771	18.4951	Not reported	OL912808
Epiphora bauhiniae (Guérin-Méneville, 1832)	Attacini	GM5.2	Larva	2020-02-26	Namibia	Okonjima	-20.7579	16.7898	Yes	OL912809
Gonimbrasia tyrrhea (Cramer, 1776)	Bunaeini	GT1.1	Adult	2020-05-25	South Africa	Western Cape	-32.7681	18.1607	Yes	OL912810
Heniocha apollonia (Cramer, 1779)	Bunaeini	HA1	Adult	2020-10-04	South Africa	Western Cape	-34.0367	23.0495	Yes	OL912811
Heniocha dyops (Maassen, 1872)	Bunaeini	GM8.2	Adult	2020-03-15	Namibia	Windhoek	-22.8577	17.1089	Yes	OL912812
Holocerina smilax (Westwood, 1849)	Micragonini	HS5	Larva	2020-01-25	South Africa	KwaZulu-Natal	-26.15	27.9637	Not reported	OL912813
Ludia delegorguei (Boisduval, 1847)	Micragonini	LD1	Larva	2020-12-12	South Africa	KwaZulu-Natal	-29.8455	30.9197	Not reported	OL912814
Nudaurelia cytherea (Fabricius, 1775)	Bunaeini	NC1.2	Larva	2020-10-12	South Africa	Western Cape	-34.3322	18.9878	Yes	OL912953
Nudaurelia wahlbergii (Boisduval, 1847)	Bunaeini	NW1	Larva	2020-12-11	South Africa	KwaZulu-Natal	-29.8244	30.9263	Yes	OL912817
Vegetia ducalis (Jordan, 1922)	Micragonini	VD1	Adult	2020-05-22	South Africa	Western Cape	-33.4201	18.4005	Not reported	OL912815
Vegetia grimmia (Geyer, 1832)	Micragonini	VG2	Adult	2020-03-12	South Africa	Western Cape	-34.3053	18.4619	Not reported	OL912816

## Sheet: BOLD BLASTn
Species	Tribe	Specimen	GenBank	BOLD ID	BOLD Similarity (%)	BLASTn (>98% identity)
Bunaea alcinoe (Stoll, 1780)	Bunaeini	BA1.6	OL912807	SATAF001-22	99.85	99.39
Eochroa trimenii (C. & R. Felder, 1874)	Eochroini	ET6	OL912808	SATAF001-22	100	No match
Epiphora bauhiniae (Guérin-Méneville, 1832)	Attacini	GM5.2	OL912809	SATAF001-22	99.85	No match
Gonimbrasia tyrrhea (Cramer, 1776)	Bunaeini	GT1.1	OL912810	SATAF001-22	100	No match
Heniocha apollonia (Cramer, 1779)	Bunaeini	HA1	OL912811	SATAF001-22	99.54	No match
Heniocha dyops (Maassen, 1872)	Bunaeini	GM8.2	OL912812	SATAF001-22	(= H. bioculata) 100	No match
Holocerina smilax (Westwood, 1849)	Micragonini	HS5	OL912813	SATAF001-22	100	No match
Ludia delegorguei (Boisduval, 1847)	Micragonini	LD1	OL912814	SATAF001-22	100	No match
Nudaurelia cytherea (Fabricius, 1775)	Bunaeini	NC1.2	OL912953	SATAF001-22	(= Gonimbrasia cytherea) 100	99.83
Nudaurelia wahlbergii (Boisduval, 1847)	Bunaeini	NW1	OL912817	SATAF001-22	100	No match
Vegetia ducalis (Jordan, 1922)	Micragonini	VD1	OL912815	SATAF001-22	99.44	No match
Vegetia grimmia (Geyer, 1832)	Micragonini	VG2	OL912816	SATAF001-22	100	No match
