# Supplementary material for: Mitogenomics and phylogenetics of twelve species of African Saturniidae (Lepidoptera)
Source: PeerJ. 2022 Apr 18;10:e13275. doi: 10.7717/peerj.13275 (PMC9022641; doi:10.7717/peerj.13275)
Supplement: Supplemental Information 4 — Main features of the complete mitogenomes of 12 African Saturniidae (Lepidoptera) species. N - minority strand; J –majority strand; IGN –number of intergenic nucleotides (negative values indicate overlapping genes). [file peerj-10-13275-s004.xlsx]

## Sheet: Sheet1
				Bunaea alcinoe						Eochroa trimenii
Gene/region	Amino acid	Anticodon	Strand	Coordinates		Size (bp)	Start	Stop	IGN	Coordinates		Size (bp)	Start	Stop	IGN
tRNAMet	M	ATG	J	2	68	67	-	-	1	1	67	67	-	-	0
tRNAIle	I	ATC	J	67	130	64	-	-	-2	68	132	65	-	-	0
tRNAGln	Q	CAA	J	127	198	72	-	-	-4	130	198	69	-	-	-3
ND2	-	-	J	247	1260	1014	ATT	TAA	48	254	1267	1014	ATT	TAA	55
tRNATrp	W	TGA	J	1262	1330	69	-	-	1	1274	1341	68	-	-	6
tRNACys	C	TGC	N	1321	1388	68	-	-	-10	1334	1395	62	-	-	-8
tRNATyr	Y	TAC	N	1388	1453	66	-	-	-1	1400	1463	64	-	-	4
COI	-	-	J	1462	2992	1531	CGA	T--	8	1469	2999	1531	CGA	T--	5
tRNALeu2	L2	TTA	N	2992	3060	69	-	-	-1	2998	3064	67	-	-	-2
COII	-	-	J	3060	3741	682	ATA	T--	-1	3067	3748	682	ATG	T--	2
tRNALys	K	AAG	J	3741	3813	73	-	-	-1	3747	3817	71	-	-	-2
tRNAAsp	D	GAC	J	3833	3900	68	-	-	19	3831	3899	69	-	-	13
ATP8	-	-	J	3901	4065	165	ATA	TAA	0	3902	4066	165	ATT	TAA	2
ATP6	-	-	J	4059	4736	678	ATG	TAA	-7	4060	4737	678	ATG	TAA	-7
COIII	-	-	J	4736	5524	789	ATG	TAA	-1	4737	5525	789	ATG	TAA	-1
tRNAGly	G	GGA	J	5526	5595	70	-	-	1	5523	5588	66	-	-	-3
ND3	-	-	J	5595	5948	354	ATT	TAA	-1	5594	5947	354	ATT	TAA	5
tRNAAla	A	GCA	J	5958	6026	69	-	-	9	5950	6016	67	-	-	2
tRNAArg	R	CGA	J	6024	6089	66	-	-	-3	6016	6079	64	-	-	-1
tRNAAsn	N	AAC	J	6089	6150	62	-	-	-1	6079	6143	65	-	-	-1
tRNASer1	S1	AGC	J	6148	6215	68	-	-	-3	6144	6211	68	-	-	0
tRNAGlu	E	GAA	J	6224	6288	65	-	-	8	6212	6277	66	-	-	0
tRNAPhe	F	TTC	N	6287	6354	68	-	-	-2	6285	6341	57	-	-	7
ND5	-	-	N	6354	8097	1741	ATA	T--	-1	6350	8089	1740	ATT	T--	8
tRNAHis	H	CAC	N	8097	8163	67	-	-	-1	8083	8148	66	-	-	-7
ND4	-	-	N	8164	9504	1341	ATG	TAA	0	8156	9496	1341	ATG	TAA	7
ND4L	-	-	N	9504	9794	291	ATG	TAA	-1	9496	9783	288	ATG	TAA	-1
tRNAThr	T	ACA	J	9800	9867	68	-	-	5	9782	9846	65	-	-	-2
tRNAPro	P	CCA	N	9865	9931	67	-	-	-3	9847	9911	65	-	-	0
ND6	-	-	J	9933	10466	534	ATA	TAA	1	9923	10456	534	ATA	TAA	11
CYTB	-	-	J	10473	11618	1146	ATG	TAA	6	10462	11613	1152	ATG	TAA	5
tRNASer2	S2	TCA	J	11630	11692	63	-	-	11	11612	11676	65	-	-	-2
ND1	-	-	N	11748	12686	939	ATT	TAA	55	11711	12649	939	ATG	TAA	34
tRNALeu1	L1	CTA	J	12687	12753	67	-	-	0	12651	12720	70	-	-	1
16rRNA	-	-	N	12754	14102	1349	-	-	0	12721	14070	1350	-	-	0
tRNAVal	V	GTA	N	14112	14183	72	-	-	9	14062	14128	67	-	-	-9
12rRNA	-	-	N	14184	14941	754	-	-	0	14144	14902	759	-	-	15
AT-rich region		-	J	14942	15305	364	-	-	0	14903	15254	352	-	-	0
				Epiphora bauhiniae						Gonimbrasia belina
Gene/region	Amino acid	Anticodon	Strand	Coordinates		Size (bp)	Start	Stop	IGN	Coordinates		Size (bp)	Start	Stop	IGN
tRNAMet	M	ATG	J	1	68	68	-	-	0	1	67	67	-	-	0
tRNAIle	I	ATC	J	76	139	64	-	-	7	68	132	65	-	-	0
tRNAGln	Q	CAA	J	136	206	71	-	-	-4	130	198	69	-	-	-3
ND2	-	-	J	253	1266	1014	ATT	TAA	46	250	1263	1014	ATT	TAA	51
tRNATrp	W	TGA	J	1264	1334	71	-	-	-3	1268	1336	69	-	-	4
tRNACys	C	TGC	N	1326	1387	62	-	-	-9	1329	1395	67	-	-	-8
tRNATyr	Y	TAC	N	1384	1451	68	-	-	-4	1396	1462	67	-	-	0
COI	-	-	J	1461	2991	1531	CGA	T--	9	1469	2999	1531	CGA	T--	6
tRNALeu2	L2	TTA	N	2991	3058	68	-	-	-1	3000	3066	67	-	-	0
COII	-	-	J	3058	3739	682	ATG	T--	-1	3067	3748	682	ATA	T--	0
tRNALys	K	AAG	J	3739	3811	73	-	-	-1	3749	3819	71	-	-	0
tRNAAsp	D	GAC	J	3827	3898	72	-	-	15	3834	3901	68	-	-	14
ATP8	-	-	J	3898	4062	165	ATC	TAA	-1	3902	4066	165	ATC	TAA	0
ATP6	-	-	J	4056	4733	678	ATG	TAA	-7	4060	4737	678	ATG	TAA	-7
COIII	-	-	J	4733	5521	789	ATG	TAA	-1	4737	5525	789	ATG	TAA	-1
tRNAGly	G	GGA	J	5523	5590	68	-	-	1	5528	5592	65	-	-	2
ND3	-	-	J	5590	5941	352	ATT	T--	-1	5593	5944	352	ATT	T--	0
tRNAAla	A	GCA	J	5941	6011	71	-	-	-1	5945	6011	67	-	-	0
tRNAArg	R	CGA	J	6009	6074	66	-	-	-3	6012	6078	67	-	-	0
tRNAAsn	N	AAC	J	6074	6138	65	-	-	-1	6079	6141	63	-	-	0
tRNASer1	S1	AGC	J	6139	6208	70	-	-	0	6141	6205	65	-	-	-1
tRNAGlu	E	GAA	J	6207	6275	69	-	-	-2	6206	6270	65	-	-	0
tRNAPhe	F	TTC	N	6272	6340	69	-	-	-4	6272	6338	67	-	-	1
ND5	-	-	N	6340	8083	1744	ATT	T--	-1	6339	8082	1744	ATA	T--	0
tRNAHis	H	CAC	N	8083	8150	68	-	-	-1	8083	8150	68	-	-	0
ND4	-	-	N	8150	9490	1341	ATG	TAA	-1	8156	9496	1341	ATG	TAA	5
ND4L	-	-	N	9490	9780	291	ATG	TAA	-1	9496	9786	291	ATG	TAA	-1
tRNAThr	T	ACA	J	9785	9850	66	-	-	4	9790	9856	67	-	-	3
tRNAPro	P	CCA	N	9850	9916	67	-	-	-1	9857	9926	70	-	-	0
ND6	-	-	J	9918	10448	531	ATA	TAA	1	9929	10462	534	ATT	TAA	2
CYTB	-	-	J	10455	11603	1149	ATG	TAA	6	10469	11620	1152	ATG	TAA	6
tRNASer2	S2	TCA	J	11605	11670	66	-	-	1	11655	11717	63	-	-	34
ND1	-	-	N	11691	12629	939	ATG	TAA	20	11739	12677	939	ATG	TAA	21
tRNALeu1	L1	CTA	J	12631	12697	67	-	-	1	12678	12743	66	-	-	0
16rRNA	-	-	N	12699	14054	1356	-	-	0	12744	14105	1362	-	-	0
tRNAVal	V	GTA	N	14055	14123	69	-	-	0	14114	14181	68	-	-	8
12rRNA	-	-	N	14124	14902	779	-	-	0	14180	14953	774	-	-	-2
AT-rich region		-	J	14903	15259	357	-	-	0	14954	15308	355	-	-	0
				Gonimbrasia tyrrhea						Gynanisa maja
Gene/region	Amino acid	Anticodon	Strand	Coordinates		Size (bp)	Start	Stop	IGN	Coordinates		Size (bp)	Start	Stop	IGN
tRNAMet	M	ATG	J	2	70	69	-	-	0	1	65	65	-	-	0
tRNAIle	I	ATC	J	68	132	65	-	-	-3	66	130	65	-	-	0
tRNAGln	Q	CAA	J	129	199	71	-	-	-4	128	196	69	-	-	-3
ND2	-	-	J	252	1265	1014	ATT	TAA	52	245	1261	1017	ATC	TAA	48
tRNATrp	W	TGA	J	1268	1338	71	-	-	2	1260	1325	66	-	-	-2
tRNACys	C	TGC	N	1329	1396	68	-	-	-10	1318	1385	68	-	-	-8
tRNATyr	Y	TAC	N	1396	1461	66	-	-	-1	1386	1451	66	-	-	0
COI	-	-	J	1469	2999	1531	CGA	T--	7	1460	2990	1531	CGA	T--	8
tRNALeu2	L2	TTA	N	2999	3065	67	-	-	-1	2991	3057	67	-	-	0
COII	-	-	J	3067	3748	682	ATA	T--	1	3058	3739	682	ATA	T--	0
tRNALys	K	AAG	J	3748	3820	73	-	-	-1	3740	3809	70	-	-	0
tRNAAsp	D	GAC	J	3843	3912	70	-	-	22	3831	3898	68	-	-	21
ATP8	-	-	J	3913	4077	165	ATT	TAA	0	3899	4063	165	ATT	TAA	0
ATP6	-	-	J	4071	4748	678	ATG	TAA	-7	4057	4734	678	ATG	TAA	-7
COIII	-	-	J	4748	5536	789	ATG	TAA	-1	4734	5522	789	ATG	TAA	-1
tRNAGly	G	GGA	J	5538	5606	69	-	-	1	5525	5589	65	-	-	2
ND3	-	-	J	5606	5959	354	ATT	TAA	-1	5590	5941	352	ATT	T--	0
tRNAAla	A	GCA	J	5963	6030	68	-	-	3	5942	6008	67	-	-	0
tRNAArg	R	CGA	J	6029	6097	69	-	-	-2	6009	6072	64	-	-	0
tRNAAsn	N	AAC	J	6097	6159	63	-	-	-1	6074	6137	64	-	-	1
tRNASer1	S1	AGC	J	6157	6226	70	-	-	-3	6137	6202	66	-	-	-1
tRNAGlu	E	GAA	J	6230	6295	66	-	-	3	6204	6273	70	-	-	1
tRNAPhe	F	TTC	N	6296	6363	68	-	-	0	6278	6346	69	-	-	4
ND5	-	-	N	6363	8106	1744	ATA	T--	-1	6347	8087	1741	ATA	T--	0
tRNAHis	H	CAC	N	8106	8175	70	-	-	-1	8088	8151	64	-	-	0
ND4	-	-	N	8180	9520	1341	ATG	TAG	4	8153	9493	1341	ATG	TAG	1
ND4L	-	-	N	9520	9810	291	ATG	TAA	-1	9493	9783	291	ATG	TAA	-1
tRNAThr	T	ACA	J	9813	9880	68	-	-	2	9794	9858	65	-	-	10
tRNAPro	P	CCA	N	9878	9946	69	-	-	-3	9859	9924	66	-	-	0
ND6	-	-	J	9948	10481	534	ATA	TAA	1	9927	10454	528	ATA	TAA	2
CYTB	-	-	J	10487	11638	1152	ATG	TAA	5	10457	11608	1152	ATG	TAA	2
tRNASer2	S2	TCA	J	11676	11742	67	-	-	37	11647	11710	64	-	-	38
ND1	-	-	N	11760	12698	939	ATT	TAA	17	11729	12667	939	ATG	TAA	18
tRNALeu1	L1	CTA	J	12700	12765	68	-	-	-1	12669	12733	65	-	-	1
16rRNA	-	-	N	12766	14123	1358	-	-	0	12736	14100	1365	-	-	2
tRNAVal	V	GTA	N	14124	14190	67	-	-	0	14102	14166	65	-	-	1
12rRNA	-	-	N	14191	14945	755	-	-	0	14167	14925	759	-	-	0
AT-rich region		-	J	14946	1	352	-	-	0	14926	15275	350	-	-	0
				Heniocha apollonia						Heniocha dyops
Gene/region	Amino acid	Anticodon	Strand	Coordinates		Size (bp)	Start	Stop	IGN	Coordinates		Size (bp)	Start	Stop	IGN
tRNAMet	M	ATG	J	1	66	66	-	-	0	1	65	65	-	-	0
tRNAIle	I	ATC	J	74	137	64	-	-	7	61	126	66	-	-	-5
tRNAGln	Q	CAA	J	135	202	68	-	-	-3	122	191	70	-	-	-5
ND2	-	-	J	256	1270	1015	ATT	TAA	53	242	1255	1014	ATC	TAA	50
tRNATrp	W	TGA	J	1276	1344	69	-	-	5	1253	1322	70	-	-	-3
tRNACys	C	TGC	N	1337	1403	67	-	-	-8	1314	1376	63	-	-	-9
tRNATyr	Y	TAC	N	1404	1471	68	-	-	0	1376	1441	66	-	-	-1
COI	-	-	J	1477	3007	1531	CGA	T--	5	1449	2979	1531	CGA	T--	7
tRNALeu2	L2	TTA	N	3008	3074	67	-	-	0	2979	3047	69	-	-	-1
COII	-	-	J	3075	3756	682	ATA	T--	0	3047	3728	682	ATA	T--	-1
tRNALys	K	AAG	J	3757	3827	71	-	-	0	3728	3800	73	-	-	-1
tRNAAsp	D	GAC	J	3853	3918	66	-	-	25	3828	3898	71	-	-	27
ATP8	-	-	J	3919	4086	168	ATC	TAA	0	3898	4068	171	ATT	TAA	-1
ATP6	-	-	J	4080	4757	678	ATG	TAA	-7	4062	4739	678	ATG	TAA	-7
COIII	-	-	J	4757	5545	789	ATG	TAA	-1	4739	5527	789	ATG	TAA	-1
tRNAGly	G	GGA	J	5550	5614	65	-	-	4	5532	5597	66	-	-	4
ND3	-	-	J	5616	5969	354	ATT	TAA	1	5597	5950	354	ATT	TAA	-1
tRNAAla	A	GCA	J	5974	6040	67	-	-	4	5955	6024	70	-	-	4
tRNAArg	R	CGA	J	6041	6104	64	-	-	0	6022	6086	65	-	-	-3
tRNAAsn	N	AAC	J	6105	6169	65	-	-	0	6098	6165	68	-	-	11
tRNASer1	S1	AGC	J	6170	6236	67	-	-	0	6166	6233	68	-	-	0
tRNAGlu	E	GAA	J	6237	6301	65	-	-	0	6232	6299	68	-	-	-2
tRNAPhe	F	TTC	N	6305	6371	67	-	-	3	6295	6362	68	-	-	-5
ND5	-	-	N	6372	8113	1741	ATT	T--	1	6364	8106	1743	ATT	TAA	1
tRNAHis	H	CAC	N	8112	8176	65	-	-	-2	8106	8172	67	-	-	-1
ND4	-	-	N	8180	9520	1341	ATG	TAA	3	8173	9513	1341	ATG	TAA	0
ND4L	-	-	N	9521	9811	291	ATG	TAG	0	9515	9805	291	ATG	TAA	1
tRNAThr	T	ACA	J	9814	9877	64	-	-	2	9811	9879	69	-	-	5
tRNAPro	P	CCA	N	9878	9941	64	-	-	0	9877	9943	67	-	-	-3
ND6	-	-	J	9947	10480	534	ATA	TAA	5	9945	10478	534	ATA	TAA	1
CYTB	-	-	J	10484	11638	1155	ATG	TAA	3	10484	11635	1152	ATG	TAA	5
tRNASer2	S2	TCA	J	11646	11710	65	-	-	7	11676	11741	66	-	-	40
ND1	-	-	N	11732	12670	939	ATG	TAG	21	11760	12698	939	ATG	TAA	18
tRNALeu1	L1	CTA	J	12671	12733	63	-	-	0	12699	12761	63	-	-	0
16rRNA	-	-	N	12734	14085	1352	-	-	0	12762	14124	1363	-	-	0
tRNAVal	V	GTA	N	14089	14155	67	-	-	3	14125	14192	68	-	-	0
12rRNA	-	-	N	14158	14911	754	-	-	2	14193	14945	753	-	-	0
AT-rich region		-	J	14912	15270	359	-	-	0	14946	15306	361	-	-	0
				Holocerina smilax						Ludia delegorguei
Gene/region	Amino acid	Anticodon	Strand	Coordinates		Size (bp)	Start	Stop	IGN	Coordinates		Size (bp)	Start	Stop	IGN
tRNAMet	M	ATG	J	1	68	68	-	-	0	2	78	67	-	-	1
tRNAIle	I	ATC	J	70	133	64	-	-	1	69	132	64	-	-	0
tRNAGln	Q	CAA	J	131	199	69	-	-	-3	130	198	69	-	-	-3
ND2	-	-	J	246	1259	1014	ATT	TAA	46	249	1262	1014	ATT	TAA	50
tRNATrp	W	TGA	J	1268	1334	67	-	-	8	1270	1336	67	-	-	7
tRNACys	C	TGC	N	1327	1388	62	-	-	-8	1329	1393	65	-	-	-8
tRNATyr	Y	TAC	N	1389	1454	66	-	-	0	1396	1459	64	-	-	2
COI	-	-	J	1463	2993	1531	CGA	T--	8	1465	2994	1530	CGA	T--	5
tRNALeu2	L2	TTA	N	2994	3062	69	-	-	0	2995	3062	68	-	-	-1
COII	-	-	J	3063	3744	682	GTG	T--	0	3065	3746	682	ATG	T--	2
tRNALys	K	AAG	J	3745	3815	71	-	-	0	3746	3816	71	-	-	-1
tRNAAsp	D	GAC	J	3826	3893	68	-	-	10	3836	3901	66	-	-	19
ATP8	-	-	J	3894	4055	162	ATC	TAA	0	3903	4061	159	ATT	TAA	1
ATP6	-	-	J	4049	4726	678	ATG	TAA	-7	4055	4732	678	ATG	TAA	-7
COIII	-	-	J	4726	5514	789	ATG	TAA	-1	4732	5520	789	ATG	TAA	-1
tRNAGly	G	GGA	J	5517	5582	66	-	-	2	5518	5583	66	-	-	-3
ND3	-	-	J	5583	5936	354	ATT	TAA	0	5589	5942	354	ATT	TAA	5
tRNAAla	A	GCA	J	5945	6009	65	-	-	8	5940	6004	65	-	-	-3
tRNAArg	R	CGA	J	6010	6072	63	-	-	0	6005	6067	63	-	-	0
tRNAAsn	N	AAC	J	6073	6138	66	-	-	0	6068	6132	65	-	-	0
tRNASer1	S1	AGC	J	6138	6203	66	-	-	-1	6132	6197	66	-	-	-1
tRNAGlu	E	GAA	J	6206	6274	69	-	-	2	6199	6264	66	-	-	1
tRNAPhe	F	TTC	N	6275	6340	66	-	-	0	6271	6337	67	-	-	6
ND5	-	-	N	6341	8072	1732	ATT	T--	0	6346	8077	1732	ATT	T--	8
tRNAHis	H	CAC	N	8073	8139	67	-	-	0	8073	8137	65	-	-	-5
ND4	-	-	N	8141	9481	1341	ATG	TAA	1	8144	9481	1338	ATA	TAA	6
ND4L	-	-	N	9481	9768	288	ATG	TAA	-1	9485	9772	288	ATG	TAA	3
tRNAThr	T	ACA	J	9773	9837	65	-	-	4	9772	9836	65	-	-	-1
tRNAPro	P	CCA	N	9838	9901	64	-	-	0	9837	9900	64	-	-	0
ND6	-	-	J	9908	10427	520	ATN	TAA	6	9912	10439	528	ATA	TAA	11
CYTB	-	-	J	10434	11586	1153	ATG	T--	4	10448	11599	1152	ATG	TAA	8
tRNASer2	S2	TCA	J	11587	11650	64	-	-	0	11602	11667	66	-	-	2
ND1	-	-	N	11674	12612	939	ATG	TAG	23	11695	12633	939	ATG	TAA	27
tRNALeu1	L1	CTA	J	12613	12676	64	-	-	0	12635	12697	63	-	-	1
16rRNA	-	-	N	12680	14042	1363	-	-	3	12701	14060	1360	-	-	3
tRNAVal	V	GTA	N	14046	14112	67	-	-	3	14062	14129	68	-	-	1
12rRNA	-	-	N	14118	14874	757	-	-	5	14136	14894	759	-	-	6
AT-rich region		-	J	14875	15220	346	-	-	0	14895	15238	344	-	-	0
				Nudaurelia cytherea					Nudaurelia wahlbergi
Gene/region	Amino acid	Anticodon	Strand	Coordinates		Size (bp)	Start	Stop	IGN	Coordinates		Size (bp)	Start	Stop	IGN
tRNAMet	M	ATG	J	1	65	65	-	-	0	1	66	66	-	-	0
tRNAIle	I	ATC	J	66	129	64	-	-	0	65	128	64	-	-	-2
tRNAGln	Q	CAA	J	126	196	71	-	-	-4	125	195	71	-	-	-4
ND2	-	-	J	256	1269	1014	ATT	TAA	59	246	1259	1014	ATT	TAA	50
tRNATrp	W	TGA	J	1272	1343	72	-	-	2	1262	1335	74	-	-	2
tRNACys	C	TGC	N	1334	1403	70	-	-	-10	1326	1396	71	-	-	-10
tRNATyr	Y	TAC	N	1403	1468	66	-	-	-1	1396	1461	66	-	-	-1
COI	-	-	J	1484	3014	1531	CGA	T--	15	1475	3005	1531	CGA	T--	13
tRNALeu2	L2	TTA	N	3014	3082	69	-	-	-1	3005	3073	69	-	-	-1
COII	-	-	J	3082	3763	682	ATA	T--	-1	3073	3754	682	ATA	T--	-1
tRNALys	K	AAG	J	3763	3835	73	-	-	-1	3754	3826	73	-	-	-1
tRNAAsp	D	GAC	J	3853	3919	67	-	-	17	3841	3907	67	-	-	14
ATP8	-	-	J	3920	4084	165	ATT	TAA	0	3908	4072	165	ATC	TAA	0
ATP6	-	-	J	4078	4755	678	ATG	TAA	-7	4066	4743	678	ATG	TAA	-7
COIII	-	-	J	4755	5543	789	ATG	TAA	-1	4743	5531	789	ATG	TAA	-1
tRNAGly	G	GGA	J	5545	5614	70	-	-	1	5530	5598	69	-	-	-2
ND3	-	-	J	5614	5967	354	ATT	TAA	-1	5598	5954	357	ATA	TAA	-1
tRNAAla	A	GCA	J	5972	6043	72	-	-	4	5955	6024	70	-	-	0
tRNAArg	R	CGA	J	6041	6105	65	-	-	-3	6023	6085	63	-	-	-2
tRNAAsn	N	AAC	J	6105	6167	63	-	-	-1	6086	6148	63	-	-	0
tRNASer1	S1	AGC	J	6166	6235	70	-	-	-2	6147	6216	70	-	-	-2
tRNAGlu	E	GAA	J	6241	6320	80	-	-	5	6238	6306	9	-	-	6
tRNAPhe	F	TTC	N	6308	6377	70	-	-	-13	6290	6357	68	-	-	-14
ND5	-	-	N	6377	8117	1741	ATA	T--	-1	6361	8101	1741	ATA	T--	3
tRNAHis	H	CAC	N	8117	8186	70	-	-	-1	8095	8163	69	-	-	-7
ND4	-	-	N	8188	9528	1341	ATG	TAA	1	8170	9510	1341	ATG	TAA	6
ND4L	-	-	N	9528	9818	291	ATG	TAA	-1	9510	9800	291	ATG	TAA	-1
tRNAThr	T	ACA	J	9821	9888	68	-	-	2	9794	9861	68	-	-	-7
tRNAPro	P	CCA	N	9886	9954	69	-	-	-3	9859	9925	67	-	-	-3
ND6	-	-	J	9956	10486	531	ATA	TAA	1	9936	10466	531	ATA	TAA	10
CYTB	-	-	J	10492	11637	1146	ATG	TAA	5	10472	11624	1153	ATG	T--	5
tRNASer2	S2	TCA	J	11686	11752	67	-	-	48	11636	11703	68	-	-	11
ND1	-	-	N	11771	12709	939	ATT	TAA	18	11735	12673	939	ATT	TAA	31
tRNALeu1	L1	CTA	J	12710	12776	67	-	-	0	12673	12740	68	-	-	-1
16rRNA	-	-	N	12777	14165	1389	-	-	0	12741	14095	1355	-	-	0
tRNAVal	V	GTA	N	14166	14230	65	-	-	0	14087	14151	65	-	-	-9
12rRNA	-	-	N	14230	14999	769	-	-	0	14165	14931	767	-	-	13
AT-rich region		-	J	15000	15363	364	-	-	0	14932	15287	356	-	-	0
				Vegetia ducalis					Vegetia grimmia
Gene/region	AA	Anticodon	Strand	Coordinates		Size (bp)	Start	Stop	IGN	Coordinates		Size (bp)	Start	Stop	IGN
tRNAMet	M	ATG	J	1	69	69	-	-	0	1	66	66	-	-	0
tRNAIle	I	ATC	J	68	131	64	-	-	-2	69	132	64	-	-	2
tRNAGln	Q	CAA	J	128	198	71	-	-	-4	129	199	71	-	-	-4
ND2	-	-	J	246	1259	1014	ATT	TAA	47	247	1261	1015	ATT	TAA	47
tRNATrp	W	TGA	J	1268	1334	67	-	-	8	1269	1335	67	-	-	7
tRNACys	C	TGC	N	1326	1392	67	-	-	-9	1327	1392	66	-	-	-9
tRNATyr	Y	TAC	N	1393	1456	64	-	-	0	1401	1464	64	-	-	8
COI	-	-	J	1460	2990	1531	CGA	T--	3	1468	2998	1531	CGA	T--	3
tRNALeu2	L2	TTA	N	2990	3060	71	-	-	-1	2998	3068	71	-	-	-1
COII	-	-	J	3061	3742	682	ATG	T--	0	3069	3750	682	ATG	T--	0
tRNALys	K	AAG	J	3742	3814	73	-	-	-1	3750	3822	73	-	-	-1
tRNAAsp	D	GAC	J	3833	3899	67	-	-	18	3841	3908	68	-	-	18
ATP8	-	-	J	3900	4064	165	ATT	TAA	0	3909	4070	162	ATT	TAA	0
ATP6	-	-	J	4058	4735	678	ATG	TAA	-7	4064	4741	678	ATG	TAA	-7
COIII	-	-	J	4735	5523	789	ATG	TAA	-1	4741	5529	789	ATG	TAA	-1
tRNAGly	G	GGA	J	5525	5592	68	-	-	1	5531	5599	69	-	-	1
ND3	-	-	J	5592	5945	354	ATT	TAA	-1	5599	5952	354	ATT	TAA	-1
tRNAAla	A	GCA	J	5946	6013	68	-	-	0	5953	6019	67	-	-	0
tRNAArg	R	CGA	J	6011	6075	65	-	-	-3	6017	6081	65	-	-	-3
tRNAAsn	N	AAC	J	6075	6139	65	-	-	-1	6081	6145	65	-	-	-1
tRNASer1	S1	AGC	J	6137	6206	70	-	-	-3	6143	6212	70	-	-	-3
tRNAGlu	E	GAA	J	6205	6272	68	-	-	-2	6211	6278	68	-	-	-2
tRNAPhe	F	TTC	N	6273	6342	70	-	-	0	6279	6348	70	-	-	0
ND5	-	-	N	6342	8076	1735	ATT	T--	-1	6347	8085	1738	ATT	T--	-1
tRNAHis	H	CAC	N	8077	8140	64	-	-	0	8086	8149	64	-	-	0
ND4	-	-	N	8142	9482	1341	ATG	TAA	1	8151	9491	1341	ATG	TAA	1
ND4L	-	-	N	9482	9769	288	ATG	TAA	-1	9491	9778	288	ATG	TTA	-1
tRNAThr	T	ACA	J	9779	9843	65	-	-	9	9788	9852	65	-	-	9
tRNAPro	P	CCA	N	9843	9908	66	-	-	-1	9852	9917	66	-	-	-1
ND6	-	-	J	9910	10437	528	ATA	TAA	1	9919	10448	530	ATA	T--	1
CYTB	-	-	J	10445	11590	1146	ATG	TAA	7	10457	11614	1158	ATG	TAA	8
tRNASer2	S2	TCA	J	11607	11671	65	-	-	16	11618	11682	65	-	-	3
ND1	-	-	N	11690	12628	939	ATG	TAA	18	11701	12639	939	ATG	TAA	18
tRNALeu1	L1	CTA	J	12630	12692	63	-	-	1	12641	12704	64	-	-	1
16rRNA	-	-	N	12693	14045	1343	-	-	0	12708	14057	1350	-	-	3
tRNAVal	V	GTA	N	14056	14123	68	-	-	10	14069	14136	68	-	-	11
12rRNA	-	-	N	14124	14879	756	-	-	0	14134	14892	759	-	-	-3
AT-rich region		-	J	14880	15216	337	-	-	0	14893	15251	359	-	-	0
