# Supplementary material for: Mitogenomics and phylogenetics of twelve species of African Saturniidae (Lepidoptera)
Source: PeerJ. 2022 Apr 18;10:e13275. doi: 10.7717/peerj.13275 (PMC9022641; doi:10.7717/peerj.13275)
Supplement: Supplemental Information 5 — Nucleotide composition, AT and GC-skewness in complete mitogenomes, combined protein-coding genes, combined rRNAs, individual genes, and individual rRNAs of 12 new and two previously published African Saturniidae (Lepidoptera) species. [file peerj-10-13275-s005.xlsx]

## Sheet: Sheet2
Gene/Region		Bunaea alcinoe	Eochroa trimenii	Epiphora bauhiniae	Gonimbrasia belina
ATP6	AT%	79.2	79.2	78.5	79.3
	GC%	20	20.8	21.6	20.7
	AT-skew	-0.11	-0.14	-0.18	-0.114754
	GC-skew	-0.34	-0.23	-0.29	-0.31401
ATP8	AT%	87.8	92.1	92.7	88.5
	GC%	11.5	7.8	7.3	11.5
	AT-skew	-0.02	-0.03	-0.03	-0.0418079
	GC-skew	-0.69	-0.23	-0.51	-0.582609
COI	AT%	71.9	72.2	71.3	70.9
	GC%	28.2	27.9	28.7	29.1
	AT-skew	-0.12	-0.16	-0.14	-0.119887
	GC-skew	-0.11	-0.03	-0.03	-0.113402
COII	AT%	78.8	76.8	77.4	78.4
	GC%	22.1	23.1	22.6	21.6
	AT-skew	-0.04	-0.07	-0.12	-0.0433673
	GC-skew	-0.19	-0.13	0.08	-0.185185
COIII	AT%	74.5	73.9	72.4	73.9
	GC%	25.5	26.1	27.7	26.1
	AT-skew	-0.08	-0.13	-0.1	-0.0879567
	GC-skew	-0.18	-0.07	-0.05	-0.1341
CYTB	AT%	76.3	77.5	75.4	76.1
	GC%	23.7	22.4	24.7	23.9
	AT-skew	-0.12	-0.12	-0.15	-0.145861
	GC-skew	-0.27	-0.13	-0.17	-0.246862
ND1	AT%	78	79.2	77.4	79.1
	GC%	22	20.7	22.5	20.9
	AT-skew	0.19	0.2	0.24	0.198483
	GC-skew	-0.4	-0.26	-0.35	-0.349282
ND2	AT%	82.8	84	83.7	84.1
	GC%	17.1	15.8	16.3	15.8
	AT-skew	-0.16	-0.17	-0.19	-0.167658
	GC-skew	-0.39	-0.22	-0.25	-0.329114
ND3	AT%	81.9	81.6	83.3	83.6
	GC%	18	18.5	16.4	16.5
	AT-skew	-0.11	-0.2	-0.22	-0.129187
	GC-skew	-0.38	-0.14	-0.13	-0.272727
ND4	AT%	81.1	82.3	81	81.3
	GC%	18.9	17.6	19	18.8
	AT-skew	0.19	0.18	0.19	0.173432
	GC-skew	-0.38	-0.3	-0.31	-0.329787
ND4L	AT%	86.6	84.7	84.9	85.6
	GC%	13.4	15	15.1	14.4
	AT-skew	0.2	0.24	0.24	0.228972
	GC-skew	-0.43	-0.44	-0.5	-0.625
ND5	AT%	81.4	82.9	81.9	82.4
	GC%	15.5	17	18.2	17.5
	AT-skew	0.15	0.18	0.17	0.135922
	GC-skew	-0.3	-0.26	-0.3	-0.257143
ND6	AT%	83.7	87.5	81	81.8
	GC%	16.3	11.6	19	18.1
	AT-skew	-0.09	-0.11	0.19	-0.154034
	GC-skew	-0.24	-0.19	-0.31	-0.237569
PCG (total)	AT%	79	79.7	78.8	79.1
	GC	21	20.1	21.2	20.9
	AT-skew	0	-0.01	-0.01	-0.00632111
	GC-skew	-0.28	-0.17	-0.2	-0.244019
12s rRNA	AT%	84.4	84.9	84.3	85
	GC%	15.3	15	15.4	15
	AT-skew	-0.04	-0.05	-0.04	-0.0282353
	GC-skew	-0.4	-0.29	-0.36	-0.373333
16s rRNA	AT%	84	85.3	83.7	84.4
	GC%	16.9	14.7	15.6	15.6
	AT-skew	0	-0.03	0	-0.0118483
	GC-skew	-0.43	-0.29	-0.37	-0.423077
rRNA (total)	AT%	84.3	85.1	84.4	84.5
	GC%	15.7	14.8	15.6	15.4
	AT-skew	-0.0130486	-0.0387779	-0.0165877	-0.0177515
	GC-skew	-0.43949	-0.297297	-0.371795	-0.402597
Complete mitogenome	AT%	80.4	81	80	80.6
	GC%	19.3	18.2	19.9	19.2
	AT-skew	0	-0.01	-0.01	-0.00744417
	GC-skew	-0.29	-0.22	-0.21	-0.260417
Gene/Region		Gonimbrasia tyrrhea	Gynanisa maja	Heniocha apollonia	Heniocha dyops
ATP6	AT%	77.6	79.5	76.9	77.1
	GC%	22.5	20.5	23	22.9
	AT-skew	-0.14	-0.172327	-0.16	-0.18
	GC-skew	-0.33	-0.209756	-0.27	-0.25
ATP8	AT%	90.3	92.7	88.1	91.2
	GC%	9.7	7.2	11.3	8.8
	AT-skew	-0.05	-0.0722762	-0.11	-0.06
	GC-skew	-0.63	-0.333333	-0.47	-0.59
COI	AT%	71.6	72	69.3	71.9
	GC%	28.3	28	30.6	28.1
	AT-skew	-0.13	-0.166667	-0.15	-0.17
	GC-skew	-0.09	-0.0357143	-0.13	-0.06
COII	AT%	78	78.4	75.5	76.3
	GC%	21.9	21.6	24.5	23.7
	AT-skew	-0.05	-0.109694	-0.04	-0.07
	GC-skew	-0.19	-0.0462963	-0.21	-0.17
COIII	AT%	74	74.5	71.4	72.3
	GC%	26	25.5	28.6	27.6
	AT-skew	-0.08	-0.111409	-0.15	-0.15
	GC-skew	-0.12	-0.0901961	-0.1	-0.09
CYTB	AT%	74.6	75.5	75.5	73.9
	GC%	25.3	24.5	24.5	26.1
	AT-skew	-0.16	-0.14702	-0.13	-0.12
	GC-skew	-0.23	-0.2	-0.21	-0.21
ND1	AT%	77.9	78.6	76.8	76.6
	GC%	22.1	21.4	23.1	23.6
	AT-skew	0.22	0.178117	0.22	0.22
	GC-skew	-0.39	-0.336449	-0.38	-0.42
ND2	AT%	85.5	84.4	83.1	83.4
	GC%	14.5	15.5	16.9	16.6
	AT-skew	-0.19	-0.194313	-0.19	-0.2
	GC-skew	-0.26	-0.2	-0.27	-0.22
ND3	AT%	79.4	81.3	80.8	72.3
	GC%	20.7	18.7	19.2	27.6
	AT-skew	-0.13	-0.161132	-0.18	-0.15
	GC-skew	-0.31	-0.304813	-0.24	-0.09
ND4	AT%	80.6	80.8	79.3	79.7
	GC%	19.5	19.1	20.5	20.3
	AT-skew	0.17	0.205446	0.2	0.18
	GC-skew	-0.35	-0.340314	-0.39	-0.34
ND4L	AT%	85.6	86.6	82.1	83.2
	GC%	14.4	13.4	17.5	16.9
	AT-skew	0.21	0.205543	0.23	0.23
	GC-skew	-0.53	-0.492537	-0.57	-0.55
ND5	AT%	81.4	82.4	80.3	80.9
	GC%	18.6	17.6	19.6	19.1
	AT-skew	0.14	0.145631	0.17	0.14
	GC-skew	-0.25	-0.261364	-0.32	-0.29
ND6	AT%	85.2	85.3	84.3	73.9
	GC%	14.8	14.6	15.1	26.1
	AT-skew	-0.13	-0.151231	-0.13	-0.12
	GC-skew	-0.22	-0.30137	-0.31	-0.21
PCG (total)	AT%	78.8	79.3	77.4	77.9
	GC	21.3	20.7	22.5	22.1
	AT-skew	-0.01	-0.0239596	-0.01	-0.02
	GC-skew	-0.24	-0.198068	-0.25	-0.23
12s rRNA	AT%	84.8	84.9	84.4	82.8
	GC%	14.7	15.1	15.6	17.1
	AT-skew	-0.03	-0.024735	-0.07	-0.02
	GC-skew	-0.42	-0.377483	-0.36	-0.46
16s rRNA	AT%	85.2	84.7	83.7	83.9
	GC%	14.7	15.3	16	15.9
	AT-skew	-0.02	-0.0436836	-0.05	-0.04
	GC-skew	-0.4	-0.369665	-0.35	-0.41
rRNA (total)	AT%	85.1	84.8	84.1	83.5
	GC%	14.9	15.2	15.9	16.4
	AT-skew	-0.0223267	-0.0377358	-0.0535077	-0.0347305
	GC-skew	-0.395973	-0.368421	-0.358491	-0.426829
Complete mitogenome	AT%	80.3	80.8	78.8	79.1
	GC%	19.16	19.1	20.9	20.7
	AT-skew	-0.01	-0.0272277	-0.02	-0.02
	GC-skew	-0.26	-0.21466	-0.25	-0.25
Gene/Region		Holocerina smilax	Ludia delegorguei	Nudaurelia cytherea	Nudaurelia wahlbergi
ATP6	AT%	78.6	78	79.1	78.9
	GC%	21.4	22	21	21.1
	AT-skew	-0.19	-0.16	-0.12	-0.12
	GC-skew	-0.24	-0.26	-0.38	-0.37
ATP8	AT%	88.8	90.6	92.7	87.9
	GC%	11.1	8.2	7.3	12.1
	AT-skew	-0.08	-0.08	-0.06	-0.05
	GC-skew	-0.23	-0.07	-0.51	-0.5
COI	AT%	70.4	71	72.6	72.5
	GC%	29.6	29	27.3	27.5
	AT-skew	-0.17	-0.15	-0.1	-0.1
	GC-skew	-0.03	-0.06	-0.12	-0.12
COII	AT%	74	77.2	78.6	78.3
	GC%	25.3	22.8	21.4	21.7
	AT-skew	-0.05	-0.08	-0.06	-0.05
	GC-skew	-0.19	-0.1	-0.15	-0.16
COIII	AT%	72.6	73.8	74.9	74.2
	GC%	27.3	26.3	25.1	25.3
	AT-skew	-0.16	-0.2	-0.06	-0.06
	GC-skew	-0.05	-0.01	-0.21	-0.2
CYTB	AT%	74.5	75.9	76.5	75.7
	GC%	24.1	24.1	23.4	24.2
	AT-skew	-0.14	-0.15	-0.11	-0.1
	GC-skew	-0.21	-0.1	-0.3	-0.31
ND1	AT%	77.5	77.5	78.6	77.2
	GC%	22.4	22.4	21.3	22.5
	AT-skew	0.19	0.22	0.22	0.23
	GC-skew	-0.31	-0.33	-0.4	-0.42
ND2	AT%	82	83.1	85	83.5
	GC%	18	16.8	15	16.4
	AT-skew	-0.22	-0.19	-0.17	-0.17
	GC-skew	-0.31	-0.26	-0.24	-0.34
ND3	AT%	79.4	81.9	82.2	82.2
	GC%	20.6	17.8	17.7	17.1
	AT-skew	-0.17	-0.22	-0.13	-0.09
	GC-skew	-0.23	-0.08	-0.37	-0.35
ND4	AT%	81	81.1	80.2	81.1
	GC%	19	18.6	19.3	18.9
	AT-skew	0.17	0.16	0.21	0.19
	GC-skew	-0.64	-0.29	-0.39	-0.39
ND4L	AT%	83.3	85.1	85.6	85.6
	GC%	16.4	14.2	13.7	13.7
	AT-skew	0.24	0.18	0.21	0.23
	GC-skew	-0.49	-0.37	-0.61	-0.61
ND5	AT%	80.7	82.3	81.6	81.9
	GC%	19.3	16.9	18	17.9
	AT-skew	0.15	0.17	0.14	0.15
	GC-skew	-0.21	-0.17	-0.31	-0.32
ND6	AT%	86.2	86.2	85.7	85.4
	GC%	13.5	13.8	13.9	14.3
	AT-skew	-0.18	-0.13	-0.1	-0.08
	GC-skew	-0.17	-0.26	-0.19	-0.26
PCG (total)	AT%	77.9	78.8	79.5	79
	GC	22	21.1	20.4	20.8
	AT-skew	-0.03	-0.03	0.1	0.1
	GC-skew	-0.2	-0.2	-0.28	-0.28
12s rRNA	AT%	83.6	83.9	84.9	84
	GC%	16.4	16.1	15	16
	AT-skew	-0.05	-0.05	-0.02	-0.02
	GC-skew	-0.34	-0.38	-0.39	-0.41
16s rRNA	AT%	83.7	84.9	85	85
	GC%	16	15	14.9	15
	AT-skew	-0.04	-0.05	-0.04	-0.02
	GC-skew	-0.4	-0.35	-0.44	-0.43
rRNA (total)	AT%	83.8	84.6	85.1	84.7
	GC%	16.3	15.5	14.9	15.3
	AT-skew	-0.0453461	-0.0472813	-0.0340776	-0.0224321
	GC-skew	-0.374233	-0.354839	-0.422819	-0.424837
Complete mitogenome	AT%	79.3	80.2	80.7	80.5
	GC%	20.5	19.7	18.9	19.3
	AT-skew	-0.03	-0.03	0	-0.03
	GC-skew	-0.22	-0.19	-0.3	-0.3
Gene/Region		Vegetia ducalis	Vegetia grimmia
ATP6	AT%	78.7	78.9
	GC%	21	21.1
	AT-skew	-0.17	-0.17
	GC-skew	-0.21	-0.23
ATP8	AT%	90.9	92.6
	GC%	8.4	6.8
	AT-skew	-0.08	-0.07
	GC-skew	-0.14	-0.26
COI	AT%	71.9	72.1
	GC%	28	27.9
	AT-skew	-0.16	-0.16
	GC-skew	-0.03	-0.02
COII	AT%	78	76
	GC%	22	23.4
	AT-skew	-0.09	-0.08
	GC-skew	-0.08	-0.11
COIII	AT%	73.7	74.2
	GC%	26.2	26.2
	AT-skew	-0.19	-0.2
	GC-skew	0.05	-0.3
CYTB	AT%	76.9	76.3
	GC%	23.1	23.8
	AT-skew	-0.17	-0.13
	GC-skew	-0.12	-0.19
ND1	AT%	78.4	78.1
	GC%	21.4	21.7
	AT-skew	0.21	0.19
	GC-skew	-0.34	-0.31
ND2	AT%	83.6	82.8
	GC%	15.9	17.1
	AT-skew	-0.2	-0.19
	GC-skew	-0.22	-0.2
ND3	AT%	81.4	83.2
	GC%	17.8	17.2
	AT-skew	-0.2	-0.2
	GC-skew	-0.11	-0.15
ND4	AT%	81.1	81
	GC%	18.9	19
	AT-skew	0.15	0.16
	GC-skew	-0.32	-0.31
ND4L	AT%	86.3	85.9
	GC%	13.4	13.8
	AT-skew	0.18	0.2
	GC-skew	-0.43	-0.45
ND5	AT%	81.2	81.5
	GC%	17.8	18.3
	AT-skew	0.18	0.17
	GC-skew	-0.25	-0.25
ND6	AT%	86.2	85.5
	GC%	13.5	13.8
	AT-skew	-0.13	-0.14
	GC-skew	-0.19	-0.2
PCG (total)	AT%	79.2	78.9
	GC	20.6	20.9
	AT-skew	-0.03	-0.3
	GC-skew	-0.17	-0.18
12s rRNA	AT%	83.6	83.8
	GC%	16.4	16
	AT-skew	-0.04	-0.05
	GC-skew	-0.39	-0.36
16s rRNA	AT%	85	85.1
	GC%	14.6	14.6
	AT-skew	-0.02	-0.05
	GC-skew	-0.36	-0.37
rRNA (total)	AT%	84.7	84.8
	GC%	15.2	15.2
	AT-skew	-0.0413223	-0.0495283
	GC-skew	-0.368421	-0.368421
Complete mitogenome	AT%	80.5	80.3
	GC%	19.3	19.5
	AT-skew	-0.03	-0.03
	GC-skew	-0.19	-0.2
