# Supplementary material for: Mitogenomics and phylogenetics of twelve species of African Saturniidae (Lepidoptera)
Source: PeerJ. 2022 Apr 18;10:e13275. doi: 10.7717/peerj.13275 (PMC9022641; doi:10.7717/peerj.13275)
Supplement: Supplemental Information 6 — Usage of start and stop codons in the mitogenomes of 12 new and two previously published African Saturniidae (Lepidoptera) species. [file peerj-10-13275-s006.xlsx]

## Sheet: Sheet2
	ATP6		ATP8		COI		COII		COIII		CYTB		ND1		ND2		ND3		ND4		ND4L		ND5		ND6
Species	Start	Stop	Start	Stop	Start	Stop	Start	Stop	Start	Stop	Start	Stop	Start	Stop	Start	Stop	Start	Stop	Start	Stop	Start	Stop	Start	Stop	Start	Stop
Bunaea alcinoe	ATG	TAA	ATA	TAA	CGA	T--	ATA	T--	ATG	TAA	ATG	TAA	ATT	TAA	ATT	TAA	ATT	TAA	ATG	TAA	ATG	TAA	ATA	T--	ATA	TAA
Eochroa trimenii	ATG	TAA	ATT	TAA	CGA	T--	ATG	T--	ATG	TAA	ATG	TAA	ATG	TAA	ATT	TAA	ATT	TAA	ATG	TAA	ATG	TAA	ATT	T--	ATA	TAA
Epiphora bauhiniae	ATG	TAA	ATC	TAA	CGA	T--	ATG	T--	ATG	TAA	ATG	TAA	ATG	TAA	ATT	TAA	ATT	T--	ATG	TAA	ATG	TAA	ATT	T--	ATA	TAA
Gonimbrasia belina	ATG	TAA	ATC	TAA	CGA	T--	ATA	T--	ATG	TAA	ATG	TAA	ATG	TAA	ATT	TAA	ATT	T--	ATG	TAA	ATG	TAA	ATA	T--	ATT	TAA
Gonimbrasia tyrrhea	ATG	TAA	ATT	TAA	CGA	T--	ATA	T--	ATG	TAA	ATG	TAA	ATT	TAA	ATT	TAA	ATT	TAA	ATG	TAG	ATG	TAA	ATA	T--	ATA	TAA
Gynanisa maja	ATG	TAA	ATT	TAA	CGA	T--	ATA	T--	ATG	TAA	ATG	TAA	ATG	TAA	ATC	TAA	ATT	T--	ATG	TAA	ATG	TAA	ATA	T--	ATA	TAA
Heniocha apollonia	ATG	TAA	ATC	TAA	CGA	T--	ATA	T--	ATG	TAA	ATG	TAA	ATG	TAA	ATT	TAA	ATT	TAA	ATG	TAA	ATG	TAG	ATT	TA-	ATA	T--
Heniocha dyops	ATG	TAA	ATT	TAA	CGA	T--	ATA	T--	ATG	TAA	ATG	TAA	ATG	TAA	ATT	TAA	ATT	TAA	ATG	TAA	ATG	TAA	ATT	TAA	ATA	TAA
Holocerina smilax	ATG	TAA	ATC	TAA	CGA	T--	GTG	T--	ATG	TAA	ATG	T--	ATG	TAG	ATT	TAA	ATT	TAA	ATG	TAA	ATG	TAA	ATT	T--	ATN	TAA
Ludia delegorguei	ATG	TAA	ATT	TAA	CGA	T--	ATG	T--	ATG	TAA	ATG	TAA	ATG	TAA	ATT	TAA	ATT	TAA	ATA	TAA	ATG	TAA	ATT	T--	ATA	TAA
Nudaurelia cytherea	ATG	TAA	ATT	TAA	CGA	T--	ATA	T--	ATG	TAA	ATG	TAA	ATT	TAA	ATT	TAA	ATT	TAA	ATG	TAA	ATG	TAA	ATA	T--	ATA	TAA
Nudaurelia wahlbergii	ATG	TAA	ATC	TAA	CGA	T--	ATA	T--	ATG	TAA	ATG	T--	ATT	TAA	ATT	TAA	ATT	TAA	ATG	TAA	ATG	TAA	ATA	T--	ATA	TAA
Vegetia ducalis	ATG	TAA	ATT	TAA	CGA	T--	ATG	T--	ATG	TAA	ATG	TAA	ATG	TAA	ATT	TAA	ATT	TAA	ATG	TAA	ATG	TAA	ATT	T--	ATA	TAA
Vegetia grimmia	ATG	TAA	ATT	TAA	CGA	T--	ATG	T--	ATG	TAA	ATG	TAA	ATG	TAA	ATT	TAA	ATT	TAA	ATG	TAA	ATG	TAA	ATT	T--	ATA	TAA
